# Supplementary material for: Chemical (Alkali) Burn-Induced Neurotrophic Keratitis Model in New Zealand Rabbit Investigated Using Medical Clinical Readouts and In Vivo Confocal Microscopy (IVCM)
Source: MDPI journal article supplement (doi:10.3390/cells13050379), 2024-02-22
Supplement: s1 [file s1]

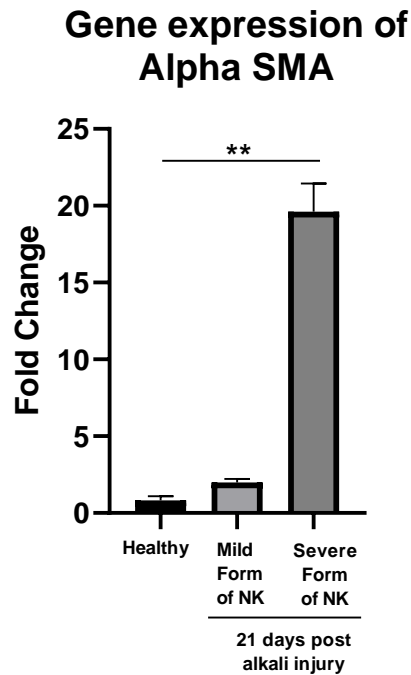

Figure S1. Real-time PCR shows the expression of alpha-SMA in the mild form and severe form of NK. Significant upregulation of the expression of alpha-SMA was observed in the severe form of NK as compared to the control and mild form of NK

#### Supplementary Table 1:

##### Primer Sequence for gene expression profiling using real time PCR (26)

| Gene Name        | Forward Primer         | Reverse Primer         |
|------------------|------------------------|------------------------|
| <b>GAPDH</b>     | TGACGACATCAAGAAGGTGGTG | GAAGGTGGAGGAGTGGGTGTC  |
| <b>Alpha SMA</b> | CTGACCGTATGCAGAAGGAAA  | AGAAACAGAGCAGGGAAGTGAC |

#### Supplementary Table 2:

##### Scheme of conversion from original machine readout to relative scoring

|                   | Absolute values obtained from the instrument  |                                            |                                                    |                                  |                                               |                         |
|-------------------|-----------------------------------------------|--------------------------------------------|----------------------------------------------------|----------------------------------|-----------------------------------------------|-------------------------|
|                   | Corneal Thickness (In $\mu\text{m}$ ) (0-5mm) | Transparency (In Gray Scale Unite) (0-5mm) | Epithelial Cell density (cells per $\text{mm}^2$ ) | Nerve Density (fibres per frame) | Keratocyte Density (cells per $\text{mm}^2$ ) | Nerve Sensation (In mm) |
| Healthy           | 348.9                                         | 20                                         | 4773                                               | 6                                | 362                                           | 60                      |
| Mild Form of NK   | 347.5                                         | 35                                         | 4536                                               | 2.25                             | 321                                           | 57                      |
| Severe Form of NK | 694.5                                         | 82                                         | 3072                                               | 0.25                             | 296                                           | 21                      |

|                   | Normalized Values |     |    |      |    |    |
|-------------------|-------------------|-----|----|------|----|----|
| Healthy           | 10                | 10  | 10 | 10   | 10 | 10 |
| Mild Form of NK   | 9                 | 6.5 | 9  | 3.75 | 8  | 8  |
| Severe Form of NK | 2                 | 2   | 6  | 0.4  | 7  | 3  |
